# Supplementary material for: Development of Good Manufacturing Practice-Compatible Isolation and Culture Methods for Human Olfactory Mucosa-Derived Mesenchymal Stromal Cells
Source: MDPI journal article supplement (doi:10.3390/ijms25020743), 2024-01-06
Supplement: s1 [file s1]

## Product Testing Unit SNBTS - Default

ELx808 reader

Lonza - WinKQCL Version 5.1.2

Page 1 of 2

|                               |                                    |                  |                     |
|-------------------------------|------------------------------------|------------------|---------------------|
| Performed By : F.MITCHELL     | LAL Lot No. : XL041KRP2Y           | Exp : 02/04/2023 | Time : 12:11:25     |
| PYROGENT-5000 - Routine Test  | Water Lot No. : 0001098994         | Exp : 10/03/2024 | Date : 05/10/2022   |
| Template : 051022/01          | Endotoxin Lot No. : 0001011300     | Exp : 02/06/2025 | ELx808              |
| Temperature : 36.9°C - 37.0°C | Recon. Buffer Lot No. : 0001019067 | Exp : 01/07/2023 | S/N 253635          |
| Linear Regression :           | Correlation Coefficient = -0.997   | Slope = -0.238   | Y-Intercept = 2.820 |
| PowerCurve :                  | A = 2.8000                         | B = -0.2119      | C = 0.0179          |
|                               |                                    | D = -0.0028      | E = 0.0000          |

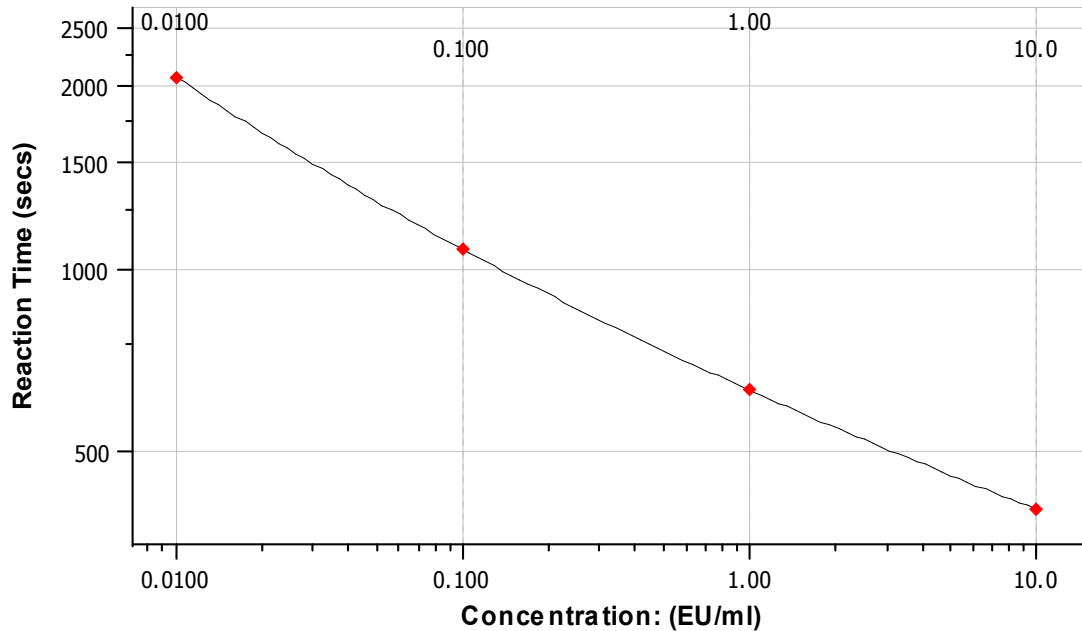**Standards Results**

| Standards  | Conc./Dil. | Average Reaction Time (sec) | Back Prediction (Power Curve) | % CV  | Status    | Notes |
|------------|------------|-----------------------------|-------------------------------|-------|-----------|-------|
| Blank      | Blank      | ****                        | ****                          | N/A   | Undefined | *     |
| Standard 1 | 0.0100     | 2078                        | 0.0100                        | 1.19% | PASS      |       |
| Standard 2 | 0.100      | 1078                        | 0.100                         | 0.66% | PASS      |       |
| Standard 3 | 1.00       | 631                         | 1.00                          | 2.69% | PASS      |       |
| Standard 4 | 10.0       | 401                         | 10.0                          | 3.88% | PASS      |       |

**Product Results**

| Samples                    | Conc./Dil. | Lot Number     | Product ID | Results (Power Curve) | %CV | % PPC Recovery | % PPC Rec. Status | PPC %CV | Notes |
|----------------------------|------------|----------------|------------|-----------------------|-----|----------------|-------------------|---------|-------|
| <u>OM-MSC - Antibiotic</u> |            |                |            |                       |     |                |                   |         |       |
| 1                          | 40         | CS022-01 (1) - | 033803     | < 0.400               |     | 99%            | PASS              | 2.16%   | *     |
| <u>OM-MSC - Antibiotic</u> |            |                |            |                       |     |                |                   |         |       |
| 1                          | 40         | CS022-02 (2) - | 033805     | < 0.400               |     | 121%           | PASS              | 2.75%   | *     |
| <u>OM-MSC - Antibiotic</u> |            |                |            |                       |     |                |                   |         |       |
| 1                          | 40         | CS022-03 (3) - | 033807     | < 0.400               |     | 102%           | PASS              | 1.12%   | *     |

**Curve Parameters**

| Parameter               | Value  | Specification    | Status |
|-------------------------|--------|------------------|--------|
| Correlation Coefficient | -0.997 | -1.000 to -0.980 | PASS   |
| Slope                   | -0.238 | -0.400 to -0.100 | PASS   |
| Y Intercept             | 2.820  | 2.500 to 3.500   | PASS   |

Signed By : Fiona Mitchell (et1-sig) Date/Time : 05/10/2022 13:51:03  
Fiona Mitchell (F.MITCHELL)

Reviewed By : Stuart Doig (et1-sig) Date/Time : 05/10/2022 14:00:56  
Stuart Doig (S.DOIG)

( !! = Masked, \*\*\*\* = reaction time > 2100, ???? = atypical, # = Modified, >>>> = High OD, See Comment Page)

( In Notes : ! = Masked Point(s), \* = Point(s) Did Not React, ? = Atypical Point(s), # = Modified, > = High OD, <LS = Less than the lowest standard)

## Product Testing Unit SNBTS - Default

ELx808 reader

Lonza - WinKQCL Version 5.1.2

Page 2 of 2

|                               |                                    |                  |                     |
|-------------------------------|------------------------------------|------------------|---------------------|
| Performed By : F.MITCHELL     | LAL Lot No. : XL041KRP2Y           | Exp : 02/04/2023 | Time : 12:11:25     |
| PYROGENT-5000 - Routine Test  | Water Lot No. : 0001098994         | Exp : 10/03/2024 | Date : 05/10/2022   |
| Template : 051022/01          | Endotoxin Lot No. : 0001011300     | Exp : 02/06/2025 | ELx808              |
| Temperature : 36.9°C - 37.0°C | Recon. Buffer Lot No. : 0001019067 | Exp : 01/07/2023 | S/N 253635          |
| Linear Regression :           | Correlation Coefficient = -0.997   | Slope = -0.238   | Y-Intercept = 2.820 |
| PowerCurve :                  | A = 2.8000                         | B = -0.2119      | C = 0.0179          |
|                               |                                    | D = -0.0028      | E = 0.0000          |

**Product AER**

| Dil./Conc.                                                      | Parameter      | Results (Power Curve) | Specification | Status    | Notes             |
|-----------------------------------------------------------------|----------------|-----------------------|---------------|-----------|-------------------|
| <b>OM-MS-C - Antibiotic — Lot No. CS022-01 (1) - ID. 033803</b> |                |                       |               |           |                   |
| 40                                                              | %CV            | N/A                   | < 10%         | Undefined | *<LS or Undefined |
|                                                                 | Endotoxin      | < 0.400 EU/ml         |               | N/A       |                   |
| PPC                                                             | %CV            | 2.16%                 | < 10%         | PASS      |                   |
| PPC                                                             | % PPC Recovery | 99%                   | 50 to 200     | PASS      |                   |
| <b>OM-MS-C - Antibiotic — Lot No. CS022-02 (2) - ID. 033805</b> |                |                       |               |           |                   |
| 40                                                              | %CV            | N/A                   | < 10%         | Undefined | *<LS or Undefined |
|                                                                 | Endotoxin      | < 0.400 EU/ml         |               | N/A       |                   |
| PPC                                                             | %CV            | 2.75%                 | < 10%         | PASS      |                   |
| PPC                                                             | % PPC Recovery | 121%                  | 50 to 200     | PASS      |                   |
| <b>OM-MS-C - Antibiotic — Lot No. CS022-03 (3) - ID. 033807</b> |                |                       |               |           |                   |
| 40                                                              | %CV            | N/A                   | < 10%         | Undefined | *<LS or Undefined |
|                                                                 | Endotoxin      | < 0.400 EU/ml         |               | N/A       |                   |
| PPC                                                             | %CV            | 1.12%                 | < 10%         | PASS      |                   |
| PPC                                                             | % PPC Recovery | 102%                  | 50 to 200     | PASS      |                   |

**Reader Parameters:** Delta t (s) = 60 Measurement Filter (nm) = 340 Delta mOD = 30 Actual/Max Reads = 36/100

**Accessories Summary**

| Name                 | Lot No.  | Manufacturer         | Cal. Due Date | Exp        |
|----------------------|----------|----------------------|---------------|------------|
| 200ul Pipette Tip    | L131916G | Star Lab             |               | 31/12/2026 |
| 5ml Sample Tube      | 05322005 | Corning              |               | 28/02/2027 |
| ClipTip Pipette Tips | 20350B0  | Thermo Scientific    |               | 31/12/2025 |
| Costar 96 Well Plate | 25721035 | Corning              |               | 13/09/2024 |
| F1 ClipTip 8 Channel | OH51795  | Thermo Scientific    | 26/03/2023    |            |
| Finnpipette 100-1000 | CH83006  | Thermo Electron Corp | 23/03/2023    |            |
| Finnpipette 30-300   | CH95841  | Thermo Electron Corp | 23/03/2023    |            |
| Finnpipette5-50      | CH14831  | Thermo Scientific    | 23/03/2023    |            |
| Microplate Reader    | 253635   | Lonza                | 31/03/2023    | 31/03/2023 |
| Pipet Tips 1250uL    | 222269   | VWR                  |               | 30/09/2025 |
| Reagent Reservoirs   | 518741   | SLS                  |               | 15/07/2025 |

**Log Summary**

| Description (Comment)                                                                                     | User ID    | Date                |
|-----------------------------------------------------------------------------------------------------------|------------|---------------------|
| Routine Test RunDateTime: 05/10/2022 12:11:26 (GMT Daylight Time) Serial # : 253635                       | F.MITCHELL | 05/10/2022 12:11:25 |
| Analyst E-sig applied - F.MITCHELL Run Date/Time - Oct 05 2022 12:11:25 PM (GMT Daylight Time) Number - 0 | F.MITCHELL | 05/10/2022 13:51:03 |
| Reviewer E-sig applied - S.DOIG Run Date/Time - Oct 05 2022 12:11:25 PM (GMT Daylight Time) Number - 0    | S.DOIG     | 05/10/2022 14:00:56 |

Signed By : Fiona Mitchell (et1-sig) Date/Time : 05/10/2022 13:51:03

Fiona Mitchell (F.MITCHELL)

Reviewed By : Stuart Doig (et1-sig) Date/Time : 05/10/2022 14:00:56

Stuart Doig (S.DOIG)

( !! = Masked, \*\*\*\* = reaction time > 2100, ???? = atypical, # = Modified, >>>> = High OD, See Comment Page)

( In Notes : ! = Masked Point(s), \* = Point(s) Did Not React, ? = Atypical Point(s), # = Modified, > = High OD, <LS = Less than the lowest standard)
